# Supplementary material for: Regulatory T cell-derived extracellular vesicles modify dendritic cell function
Source: PubMed Central journal article supplement (PMC5904112; doi:10.1038/s41598-018-24531-8), 2018-04-17
Supplement: 41598_2018_24531_MOESM1_ESM.pdf [file 41598_2018_24531_MOESM1_ESM.pdf]

## Supplemental Figures

### Regulatory T cell-derived extracellular vesicles modify dendritic cell function

Sim L Tung, Dominic A Boardman, Monica Sen, Marilena Letizia, Qi Peng, Nicole Cianci, Laura Dioni, Leo M Carlin, Robert Lechler, Valentina Bollati, Giovanna Lombardi and Lesley A Smyth

#### Supplemental Figure 1 | Phenotype of BALB/c BM-DC

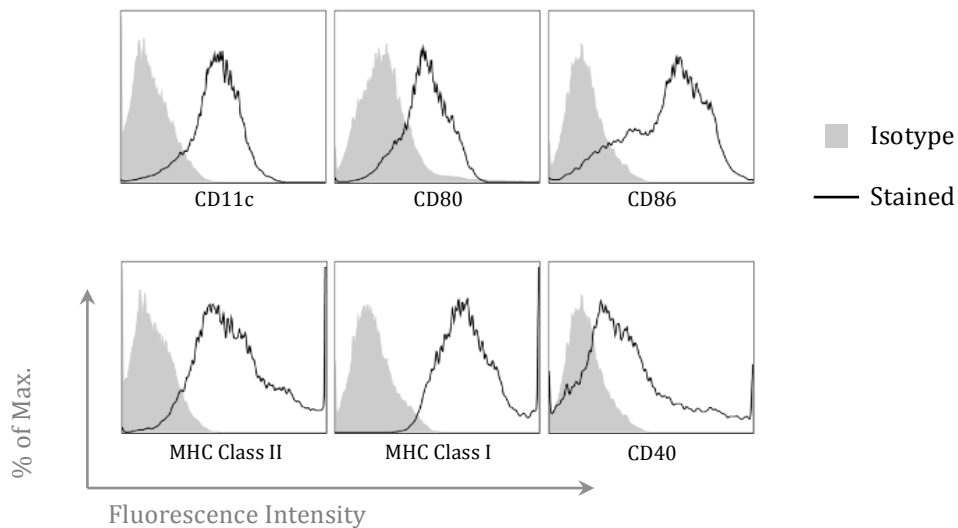

Flow cytometry histogram plots showing the expression for CD11c, CD80, CD86, MHC Class II, MHC Class I and CD40 by viable DCs following staining with fluorescent conjugated antibodies (black line). Isotype control staining is shown in solid grey. Data shown is representative of 6 individual experiments.

## Supplemental Figure 2 | Phenotype of CD4<sup>+</sup>Foxp3<sup>-</sup> control T cell line

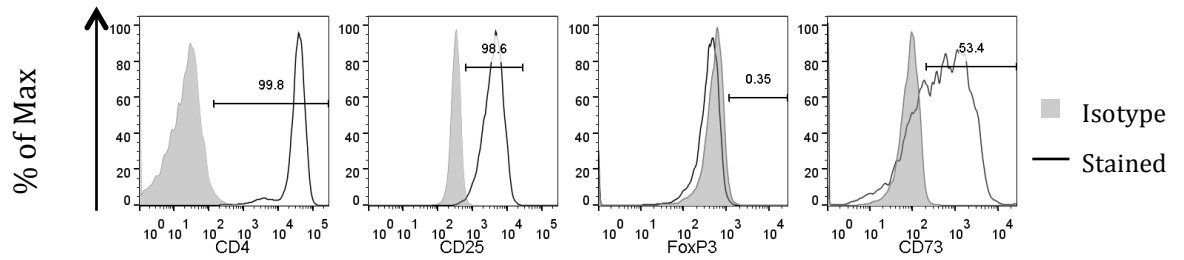

Flow cytometry histogram plots showing the expression levels of CD4, CD25, FoxP3 and CD73 by viable control T cells (black line) following staining with fluorescently conjugated antibodies. Percentage of cells expressing these markers and isotype control staining is shown in solid grey. Data shown is representative of 8 experiments.

## Supplemental Figure 3 | Nanoparticle Tracking Analysis (NTA) of Treg-derived EVs

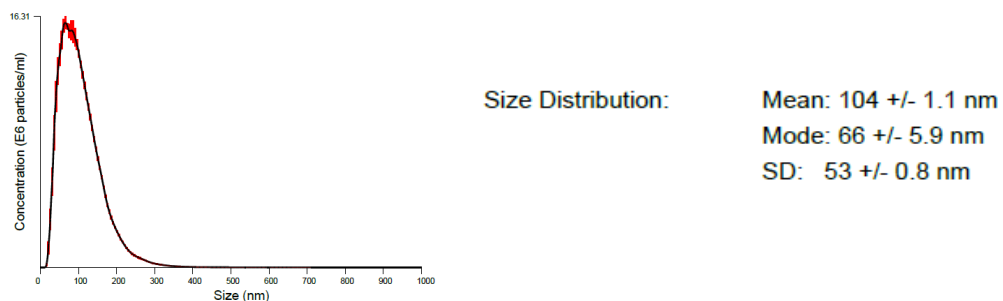

Particle size distribution of Treg derived EVs isolated from culture supernatants by EXoQuick-TC following overnight activation with plate bound

anti-CD3 and anti-CD28 antibodies. Particles were measured by nanoparticle tracking analysis on a LM-10 NanoSight instrument.

**Supplemental Figure 4 | Treg EVs contain small RNA species**

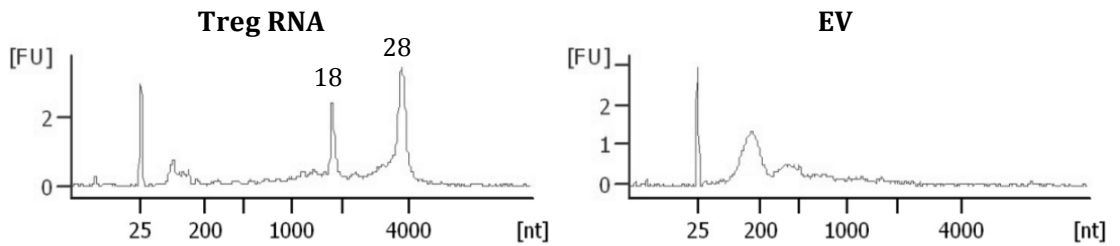

Bioanalyser analysis of RNA isolated from Tregs (left) and Treg derived EVs (right) on a total RNA Nanochip. rRNA peaks are indicated as 18S and 28S subunits in the Treg cells only and are absent in Treg derived EVs. The data is representative of 2 repeats. FU= fluorescence units and nt= nucleotides.

**Supplemental Table 1 | Table of the top 40 miRNAs expressed in Treg EVs compared to FoxP3<sup>-</sup> control EVs**

| <b>miRNA</b> | <b>Relative Quantity</b> | <b>p-value</b> |
|--------------|--------------------------|----------------|
| miR-150      | 99.405                   | 0.253          |
| snoRNA202    | 6.453                    | 0.006          |
| miR-20b      | 5.306                    | N/A            |
| miR-2134     | 4.523                    | 0.355          |
| miR-99b      | 4.508                    | N/A            |
| miR-664      | 4.281                    | 0.151          |
| miR-31       | 4.212                    | N/A            |
| miR-34b-3p   | 4.031                    | 0.283          |
| miR-2138     | 3.840                    | 0.336          |
| miR-142-3p   | 3.633                    | 0.020          |
| miR-222      | 3.589                    | 0.183          |
| miR-203      | 3.515                    | N/A            |
| miR-152      | 3.458                    | 0.122          |
| miR-139-5p   | 3.443                    | 0.308          |
| miR-221      | 3.369                    | 0.289          |
| miR-365      | 3.310                    | N/A            |
| miR-223-3p   | 3.300                    | 0.334          |
| miR-223-5p   | 3.271                    | 0.200          |
| miR-15b      | 3.152                    | 0.077          |
| miR-362-3p   | 3.114                    | N/A            |
| miR-429      | 2.913                    | 0.461          |
| miR-126      | 2.540                    | 0.121          |
| miR-342-3p   | 2.442                    | N/A            |
| miR-155      | 2.427                    | N/A            |
| miR-2182     | 2.403                    | 0.257          |
| miR-2146     | 2.386                    | 0.416          |
| miR-331      | 2.361                    | 0.284          |
| miR-21       | 2.347                    | N/A            |
| miR-212      | 2.230                    | 0.322          |
| miR-340-5p   | 2.017                    | 0.042          |
| miR-132      | 1.999                    | 0.285          |
| miR-200c     | 1.964                    | 0.282          |
| miR-148b     | 1.912                    | N/A            |
| miR-29a      | 1.775                    | 0.872          |
| let-7d       | 1.747                    | 0.204          |
| miR-125a-5p  | 1.683                    | N/A            |
| miR-328      | 1.604                    | 0.473          |
| miR-1198     | 1.532                    | 0.388          |
| miR-1897-5p  | 1.522                    | N/A            |
| miR-744      | 1.462                    | N/A            |
| miR-685      | 1.443                    | 0.251          |

A table listing the top 40 miRNAs candidates that have higher expression in Treg EVs compared to control T cell EVs. MiRNAs were ranked according to their relative quantity and associated p-values. N/A = p value of 1.
